# Supplementary material for: Manifestation of axiotaxy induced by the (10.4) plane in high-temperature-grown bismuth telluride films on InP(111)
Source: Royal Society of Chemistry journal article supplement (doi:10.1039/c7ce02021j), 2018-01-01
Supplement: c7ce02021j1.pdf [file c7ce02021j1.pdf]

## Manifestation of axiotaxy induced by the $(1\bar{1}04)$ plane in high-temperature-grown bismuth telluride films on InP(111)

Y. Takagaki,<sup>a</sup> B. Jenichen<sup>a</sup> and A. Trampert<sup>a</sup>

In Fig. S1, we show results of calculations when  $\psi_{\text{fit}}$  in Table 1 was used instead of  $\psi$  to improve the agreement with the experimental results.

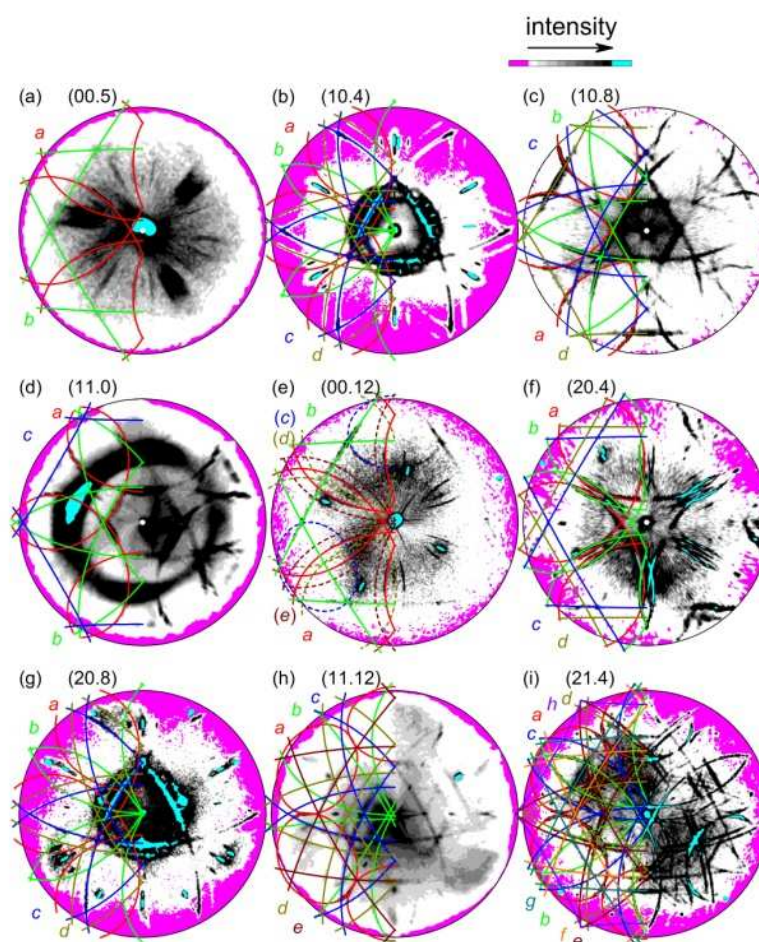

FIG. S1.
